# Supplementary material for: Autologous Cytokine-Induced Killer (CIK) Cell Immunotherapy plus Sintilimab and Chemotherapy in Advanced Non‒Small-Cell Lung Cancer: 3-Year Outcomes From the Phase Ib CCICC-002a Study
Source: Research Square preprint supplement (doi:10.21203/rs.3.rs-6139702/v1), 2025-03-11
Supplement: Supplementary file 1 [file b5268e6fa023ed88a7b860ad.docx]

**Supplementary Materials for**

Three-Years Follow-up for Patients with Advanced Non‒Small-Cell Lung Cancer Treated by Autologous Cytokine-Induced Killer (CIK) Cell Immunotherapy in Combination with Sintilimab plus Chemotherapy: (NSCLC)-CCICC-002

Weihong Zhang, Yanping Chen, Li Zhou, Yanjuan Xiong, Fan Yang, Meng Shen, Shuzhan Li, Jia-li Zhang, Weijiao Du, Zhenzhen Hui, Xiao Tian, Ying Han, Yang Wang, Shunju Pang, Baozhu Ren, Xinwei Zhang, Shui Cao, Xiubao Ren, Runmei Li, Liang Liu.

Correspondence to: Liang Liu, MD (E-mail: liuliang@tjmuch.com)

Runmei Li, MD (E-mail: lrmfocus@126.com)

Xiubao Ren, MD (E-mail: renxiubao@tjmuch.com)


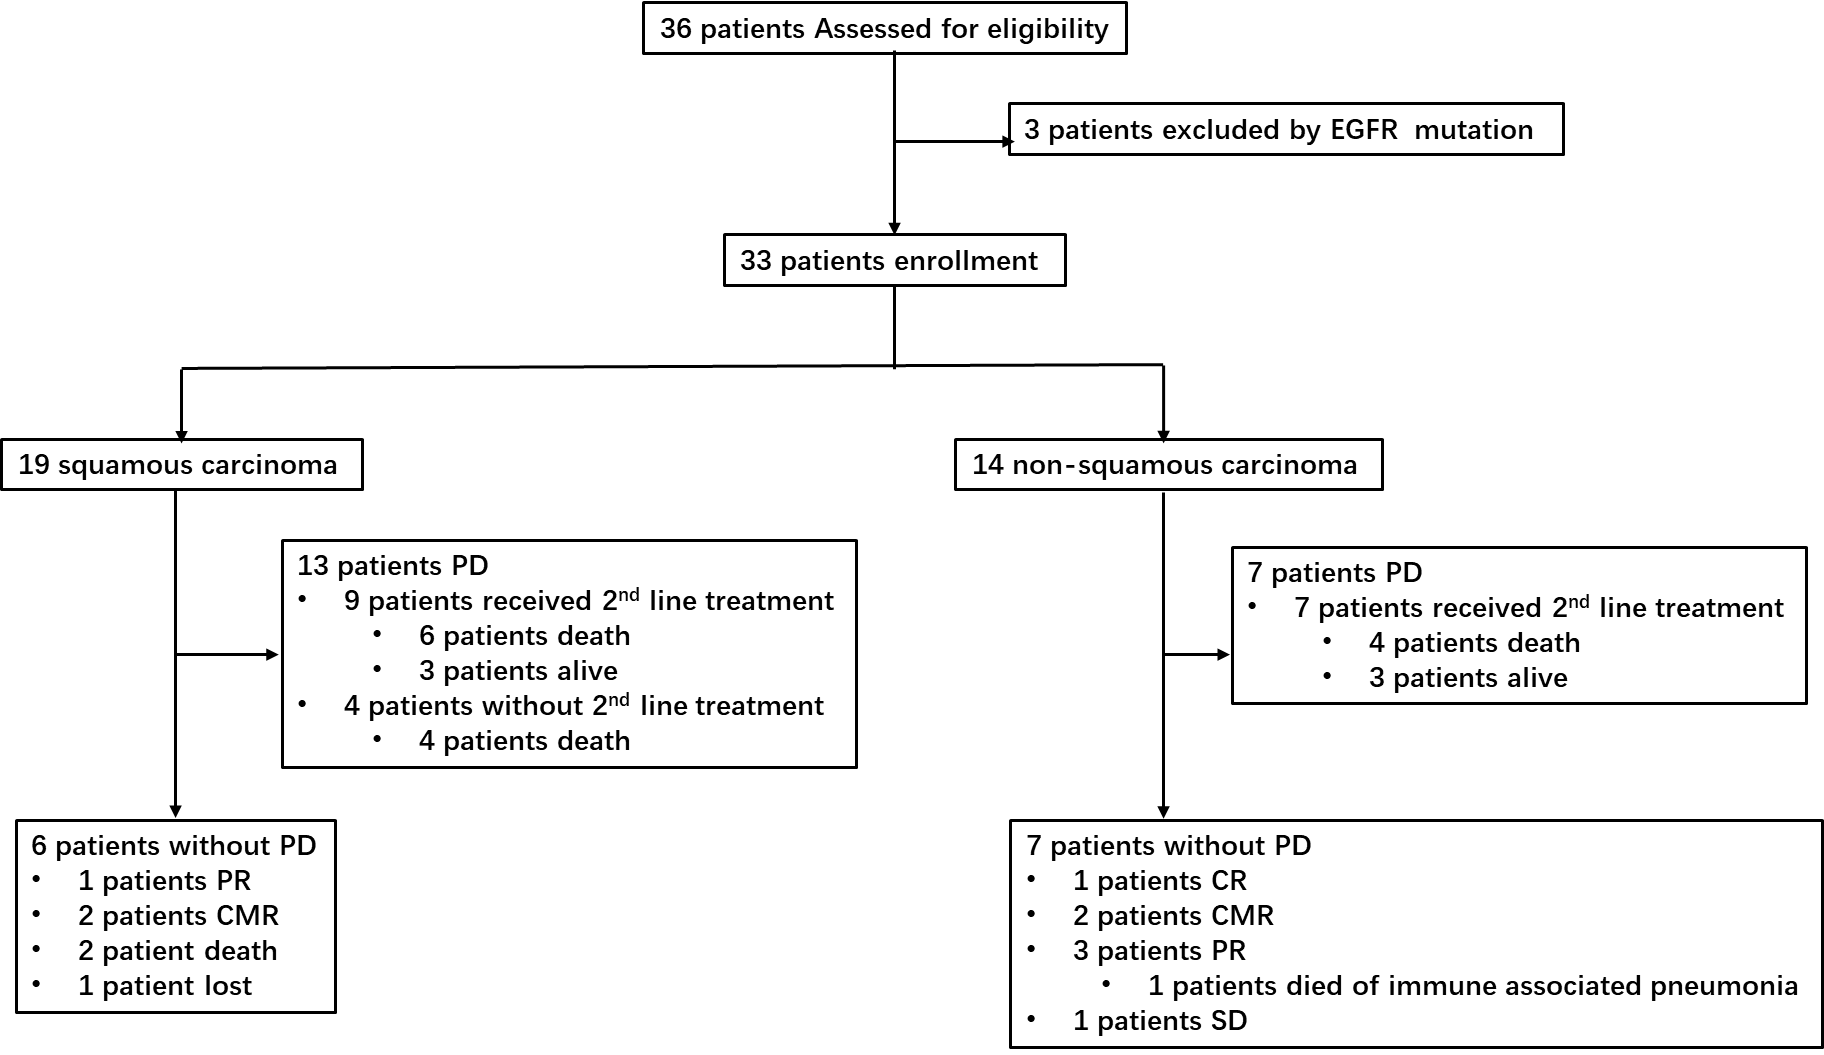


Figure S1. CONSORT Diagram for The Phase IB Trial of Autologous Cytokine-Induced Killer Cell Therapy in Combination With Sintilimab Plus Chemotherapy in Patients With Advanced NSCLC.


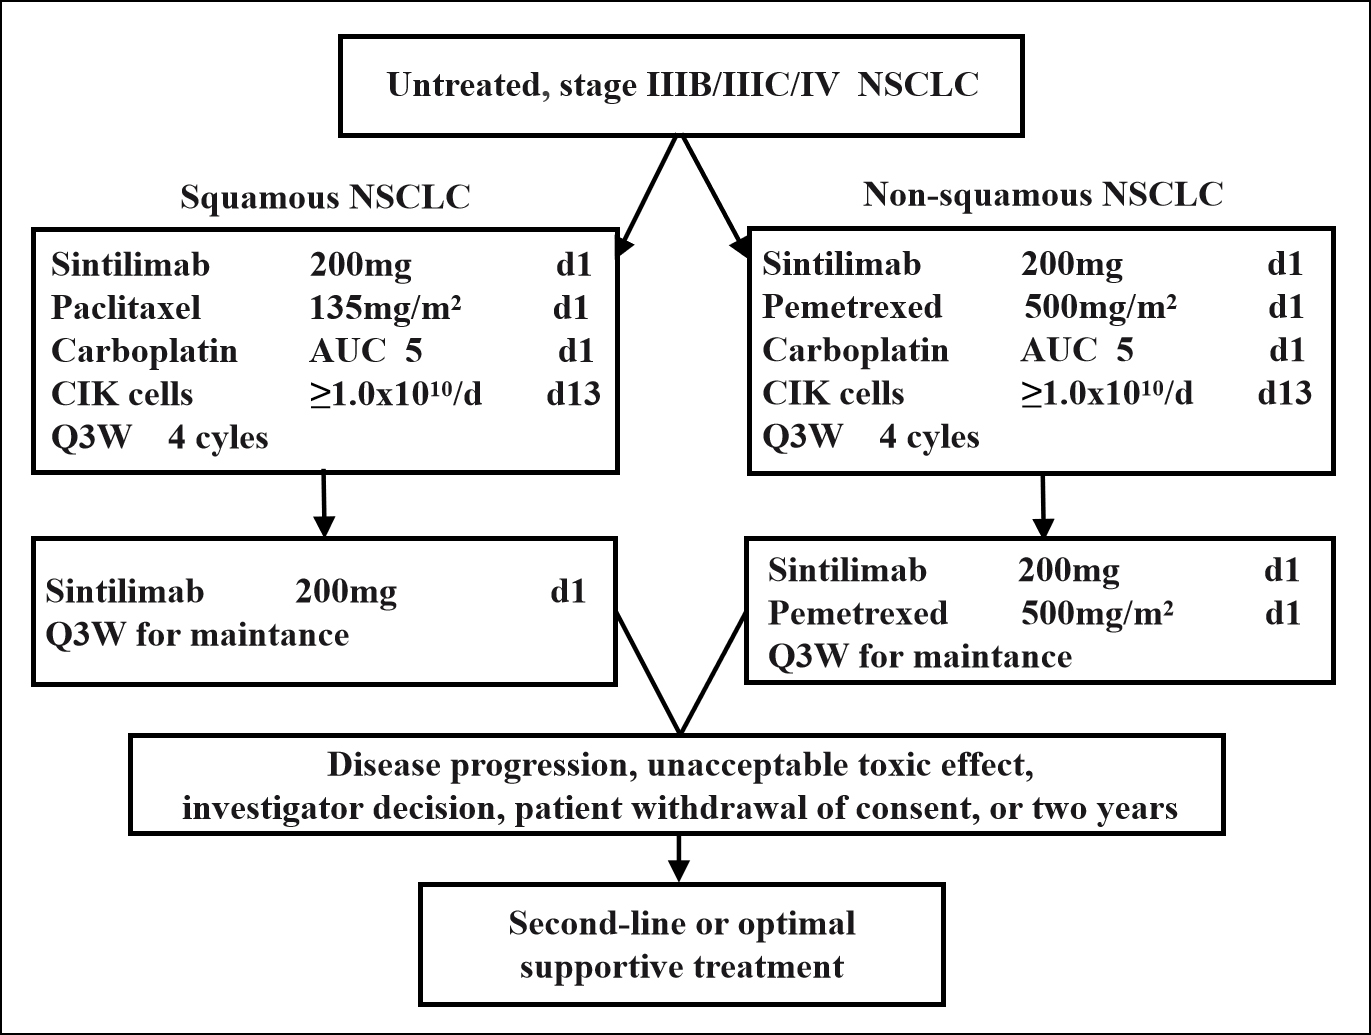


Figure S2. Treatment plan


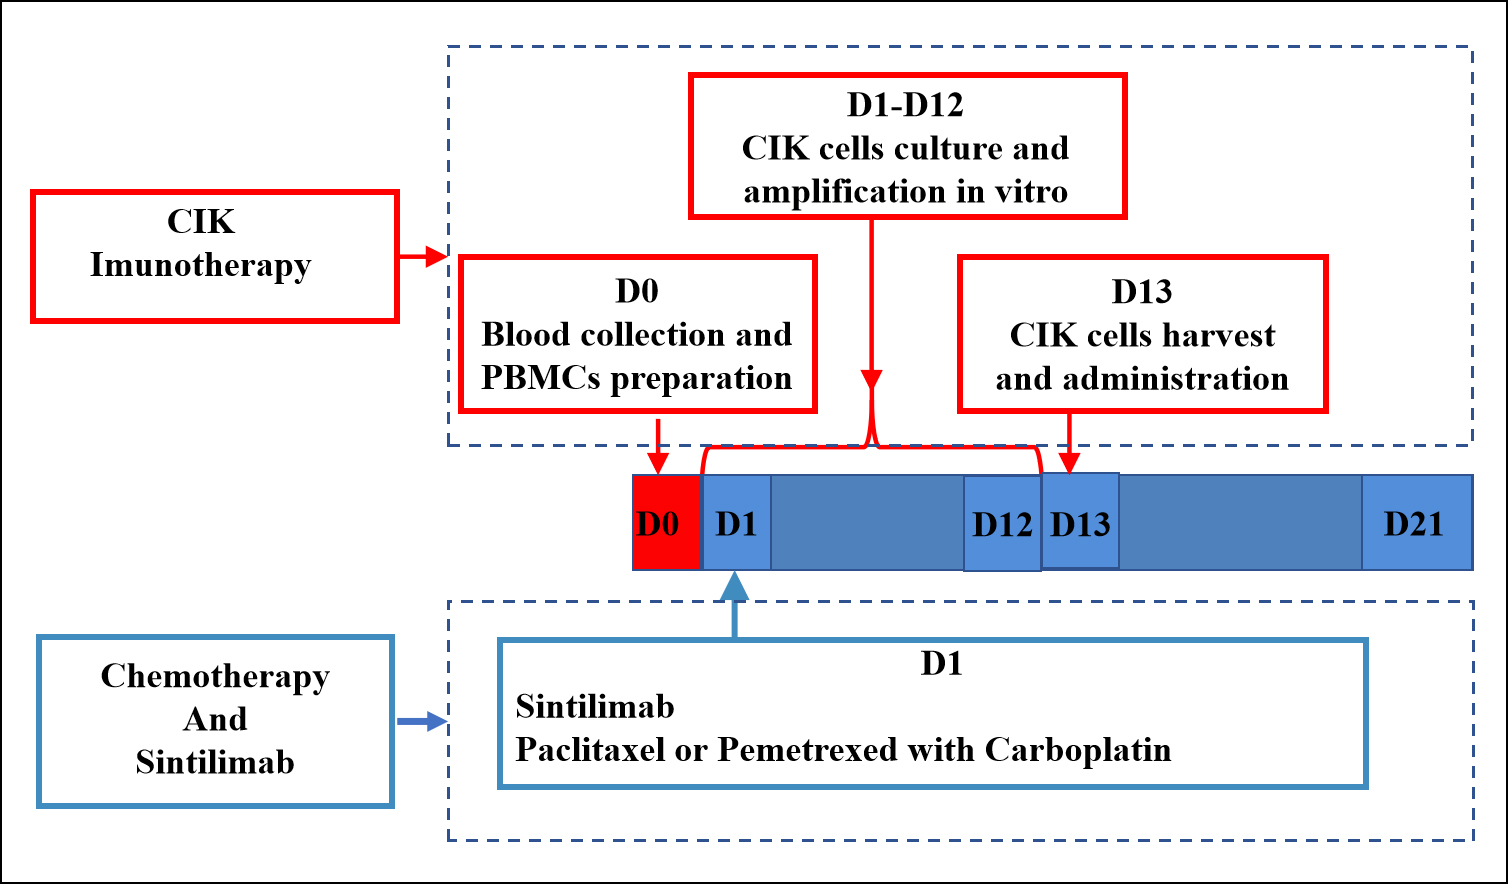


Figure S3. Treatment flow chart
